# Supplementary material
Source: MDPI journal article supplement (https://www.mdpi.com/2297-8739/10/3/210)
Supplement: s1 [file s1]

## Supplementary Material

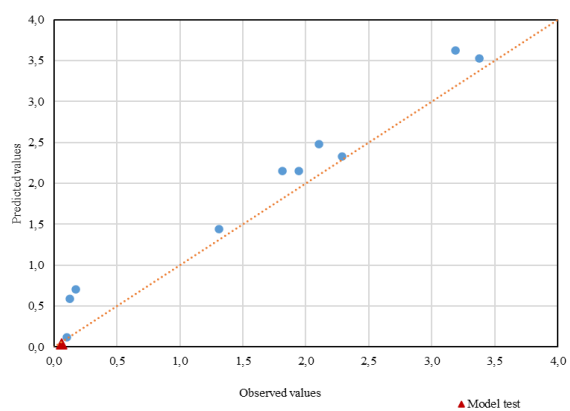

(a)

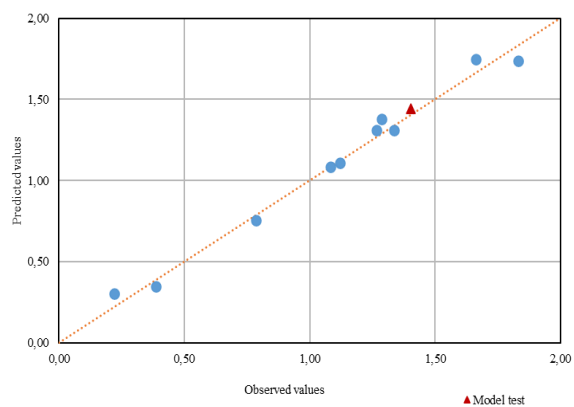

(b)

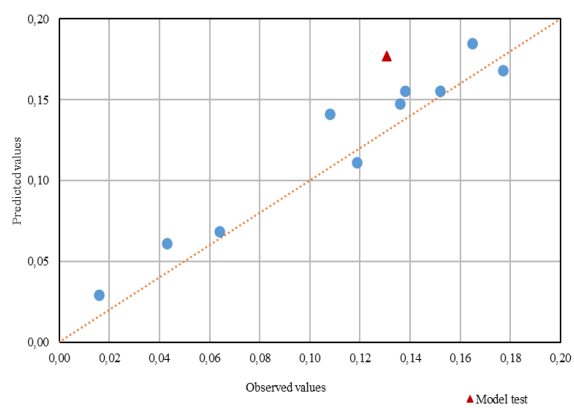

(c)

**Figure S1.** Predicted and observed data fit for SFE-CO<sub>2</sub> extracts obtained from Mo seed (a), leaf (b), and root (c) samples.

● is the correlation between predicted and observed values and ▲ represents an extra experiment to test the regression model.
